# Supplementary material for: Health Screening and Follow-up Care Among Medicaid Beneficiaries With Serious Mental Illness Enrolled in Managed Care Plans
Source: Atypon-hosted journal article supplement (doi:10.1176/appi.ps.201800081), 2018-10-01
Supplement: appi.ps.201800081.ds001.pdf [file appi.ps.201800081.ds001.pdf]

Table 1. Screening and Follow-up Care for Body Mass Index and Tobacco Use by Health Plan

|                                                                                       | BMI screening and follow-up <sup>a</sup> |      |               |      |               |      |               |      | Tobacco use screening and follow-up <sup>b</sup> |      |               |      |               |      |               |      |
|---------------------------------------------------------------------------------------|------------------------------------------|------|---------------|------|---------------|------|---------------|------|--------------------------------------------------|------|---------------|------|---------------|------|---------------|------|
|                                                                                       | All Health Plans <sup>c</sup>            |      | Health Plan 1 |      | Health Plan 2 |      | Health Plan 3 |      | All Health Plans                                 |      | Health Plan 1 |      | Health Plan 2 |      | Health Plan 3 |      |
|                                                                                       | N                                        | %    | N             | %    | N             | %    | N             | %    | N                                                | %    | N             | %    | N             | %    | N             | %    |
| Health plan members with serious mental illness <sup>d</sup>                          | 855                                      | 100  | 331           | 100  | 213           | 100  | 311           | 100  | 756                                              | 100  | 237           | 100  | 214           | 100  | 305           | 100  |
| Screened for condition                                                                | 464                                      | 54.3 | 264           | 79.8 | 140           | 65.7 | 60            | 19.3 | 356                                              | 47.1 | 180           | 75.9 | 131           | 61.2 | 45            | 14.8 |
| Screened Negative <sup>e</sup>                                                        | 237                                      | 51.1 | 120           | 45.5 | 85            | 60.7 | 32            | 53.3 | 156                                              | 43.8 | 98            | 54.4 | 42            | 32.1 | 16            | 35.5 |
| Screened Positive <sup>e</sup>                                                        | 227                                      | 48.9 | 144           | 54.5 | 55            | 39.3 | 28            | 46.7 | 200                                              | 56.2 | 82            | 45.6 | 89            | 67.9 | 29            | 64.4 |
| Received follow-up care among those who screened positive <sup>f</sup>                | 86                                       | 37.8 | 62            | 43.1 | 20            | 36.4 | 4             | 14.3 | 113                                              | 56.5 | 54            | 66.0 | 45            | 50.6 | 14            | 48.3 |
| Overall Measure Rate: Screened AND received follow-up care (if positive) <sup>g</sup> | 323                                      | 37.8 | 182           | 55.0 | 105           | 49.3 | 36            | 11.6 | 269                                              | 35.6 | 152           | 64.1 | 87            | 40.7 | 30            | 9.8  |

a. Measure assesses the proportion of health plan members with serious mental illness who received screening for BMI and received follow-up care if BMI  $\geq 30$  during a one calendar year. Follow-up care included counseling, surgery, medications, and any other documented treatment related to BMI.

b. Measure assesses the proportion of health plan members with serious mental illness who received screening for all forms of tobacco use and follow-up care if identified as tobacco user during one calendar year. Follow-up care included counseling, medications, and any other documented treatment related to tobacco use.

c. Health plans included a Dual Special Needs Plan (D-SNP) in a mid-Atlantic state (health plan 1), a Medicaid managed care plan in a Midwestern state (health plan 2), and a Medicaid managed care plan in a Western state (health plan 3). For the D-SNP, a separate Medicaid managed behavioral health organization (MBHO) was responsible for administering some community mental health and substance use disorder services but the MBHO allowed the D-SNP full access to their data systems and patient records as part of their existing relationship and collaborated with the D-SNP for the piloting of these measures. The other two plans were fully responsible for medical, behavioral health, and pharmacy benefits, and therefore had access to the records for all selected patients.

d. The denominator of each measure included health plan members with serious mental illness. Following HEDIS sampling procedures, each health plan used claims/administrative data to identify a random sample of members with serious mental illness defined as (1) at least one inpatient or outpatient/ambulatory claim with a diagnosis of schizophrenia or bipolar I disorder or (2) one inpatient or two outpatient/ambulatory care claims with a diagnosis of major depression during calendar year 2012. This definition was based on existing HEDIS measures. Inclusion in the denominator did not require receiving care for a physical health condition. Following procedures used for HEDIS measures, health plan staff requested the medical records of the members with serious mental illness included in the denominator and/or directly accessed medical records or electronic health records for these members to look for evidence of BMI and tobacco use screening and follow-up care. All health plans had access to the medical records, pharmacy data, and claims for their members. Depending on where the member received care in the community, health plans requested/accessed records from

behavioral health and/or medical providers. Health plans also used claims/administrative data to identify tobacco cessation or weight management services and medications. A data use agreement with each health plan governed data security.

e. Denominator for proportions in this row is the number of members who were screened.

f. Denominator for proportions in this row is the number of members who screened positive.

g. The overall measure rate is calculated as the number who screened negative plus the number who screened positive *and* received follow-up care divided by the total number of members with serious mental illness.
